# Supplementary material for: A gut-derived metabolite alters brain activity and anxiety behaviour in mice
Source: Springer Nature journal article supplement (doi:10.1038/s41586-022-04396-8), 2022-02-14
Supplement: MOESM10 [file 41586_2022_4396_MOESM10_ESM.xlsx]

## Sheet: ED 4e
L AM		R AM		L HY		R HY		PVT
-	+	-	+	-	+	-	+	-	+
101.869	108.999	105.189	108.348	99.645	98.422	97.1616	100.983	115.037	118.041
102.322	103.108	104.225	108.781	94.6164	96.5306	94.7736	100.597	114.732	114.363
103.789	106.036	106.903	106.695	99.8769	102.702	101.5	103.317	116.785	117.059
102.331	105.74	105.519	107.017	99.2932	99.9875	100.129	99.3274	112.616	122.453
102.258	103.603	104.608	104.167	94.5886	100.475	95.4566	100.541	114.963	113.669
105.176	105.743	104.612	107.563	97.6307	101.503	98.8467	102.131	117.962	118.019
103.846	108.1	106.096	110.649	98.4179	98.9767	100.244	99.4119	113.786	114.316
104.73	106.567	107.092	109.377	96.1982	101.105	97.7329	100.906	114.709	116.111
104.809	105.564	109.264	106.483	95.5435	98.0531	97.9513	99.5769	112.746	116.968
105.154	103.838	106.07	106.154	100.036	96.9859	97.0245	96.9649	107.729	116.729
101.591	105.982	102.778	108.114	93.871	97.8919	96.1632	99.2033	110.123	113.048
